# Supplementary material
Source: MDPI journal article supplement (https://www.mdpi.com/2571-8789/6/1/20)
Supplement: s1 [file s1]

Archive with 3 entries (3 files):
- Supplementary Figs.pdf
- Supplementary Table. 1.pdf
- Supplementary Table. 2.pdf
