# Supplementary material
Source: MDPI journal article supplement (https://www.mdpi.com/2571-8789/6/1/20)
Supplement: s1 [file s1 › Supplementary Figs.pdf]

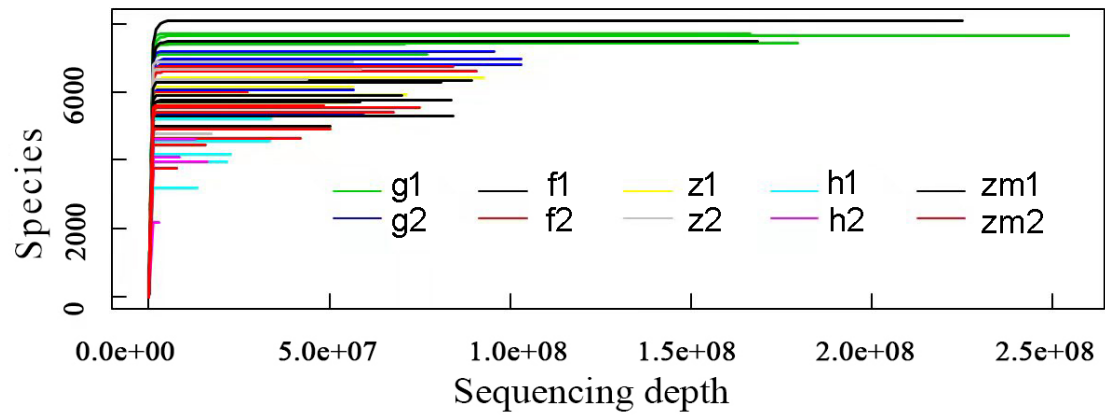

Supplementary Figure S1. The rarefaction curve.

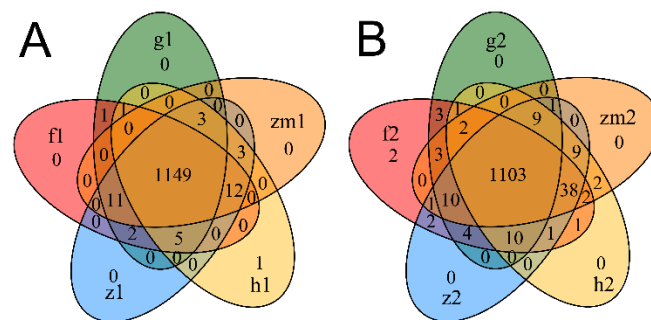

Supplementary Figure S2. The OTU venn diagram of five different land use types at 0-20 cm and 20-40 cm, respectively.
