# Supplementary material
Source: MDPI journal article supplement (https://www.mdpi.com/2571-8789/6/1/20)
Supplement: s1 [file s1 › Supplementary Table. 1.pdf]

Supplementary Table S1. The detail information of five different land use types.

| Land use types                 | Altitude | Longitude  | Latitude  | Root length<br>reach 20cm | Root length<br>reach 40cm |
|--------------------------------|----------|------------|-----------|---------------------------|---------------------------|
| <i>Zanthoxylum planispinum</i> | 517 m    | 105°39'58" | 25°40'07" | yes                       | yes                       |
| <i>Hylocereus spp.</i>         | 598 m    | 105°39'41" | 25°40'33" | yes                       | no                        |
| <i>Zea mays</i>                | 600 m    | 105°39'42" | 25°40'33" | yes                       | no                        |
| <i>grassland</i>               | 851 m    | 105°28'42" | 25°43'48" | yes                       | no                        |
| <i>secondary forest land</i>   | 798 m    | 105°28'46" | 25°43'48" | yes                       | yes                       |
