# Supplementary material
Source: MDPI journal article supplement (https://www.mdpi.com/2571-8789/6/1/20)
Supplement: s1 [file s1 › Supplementary Table. 2.pdf]

[illegible][illegible]

| g2-3    | g2-4    | g2-5    | f1-1    | f1-2    | f1-3    | f1-4    | f1-5    | f2-1    |
|---------|---------|---------|---------|---------|---------|---------|---------|---------|
| 33933   | 33933   | 33933   | 33933   | 33933   | 33933   | 33933   | 33933   | 33933   |
| 33918   | 33917   | 33902   | 33889   | 33900   | 33896   | 33859   | 33835   | 33897   |
| 15      | 16      | 31      | 44      | 33      | 35      | 74      | 98      | 36      |
| 0       | 0       | 0       | 0       | 0       | 2       | 0       | 0       | 0       |
| 99.96%  | 99.95%  | 99.91%  | 99.87%  | 99.90%  | 99.89%  | 99.78%  | 99.71%  | 99.89%  |
| 0.044%  | 0.047%  | 0.091%  | 0.130%  | 0.097%  | 0.103%  | 0.218%  | 0.289%  | 0.106%  |
| 0.0000% | 0.0000% | 0.0000% | 0.0000% | 0.0000% | 0.0059% | 0.0000% | 0.0000% | 0.0000% |

[illegible]

| z2-1    | z2-2    | z2-3    | z2-4    | z2-5    | h1-1    | h1-2    | h1-3    | h1-4    |
|---------|---------|---------|---------|---------|---------|---------|---------|---------|
| 33933   | 33933   | 33933   | 33933   | 33933   | 33933   | 33933   | 33933   | 33933   |
| 32750   | 33216   | 33330   | 33076   | 33224   | 33035   | 33242   | 33036   | 33424   |
| 1183    | 717     | 603     | 857     | 709     | 896     | 691     | 896     | 505     |
| 0       | 0       | 0       | 0       | 0       | 2       | 0       | 1       | 4       |
| 96.51%  | 97.89%  | 98.22%  | 97.47%  | 97.91%  | 97.35%  | 97.96%  | 97.36%  | 98.50%  |
| 3.486%  | 2.113%  | 1.777%  | 2.526%  | 2.089%  | 2.640%  | 2.036%  | 2.640%  | 1.488%  |
| 0.0000% | 0.0000% | 0.0000% | 0.0000% | 0.0000% | 0.0059% | 0.0000% | 0.0029% | 0.0118% |

| h1-5    | h2-1    | h2-2    | h2-3    | h2-4    | h2-5    | zm1-1   | zm1-2   | zm1-3   |
|---------|---------|---------|---------|---------|---------|---------|---------|---------|
| 33933   | 33933   | 33933   | 33933   | 33933   | 33933   | 33933   | 33933   | 33933   |
| 32999   | 33336   | 33126   | 33204   | 33204   | 33282   | 33357   | 33309   | 33445   |
| 934     | 596     | 807     | 729     | 727     | 650     | 576     | 624     | 486     |
| 0       | 1       | 0       | 0       | 2       | 1       | 0       | 0       | 2       |
| 97.25%  | 98.24%  | 97.62%  | 97.85%  | 97.85%  | 98.08%  | 98.30%  | 98.16%  | 98.56%  |
| 2.752%  | 1.756%  | 2.378%  | 2.148%  | 2.142%  | 1.916%  | 1.697%  | 1.839%  | 1.432%  |
| 0.0000% | 0.0029% | 0.0000% | 0.0000% | 0.0059% | 0.0029% | 0.0000% | 0.0000% | 0.0059% |

| zm1-4   | zm1-5   | zm2-1   | zm2-2   | zm2-3   | zm2-4   | zm2-5   | OTUsize |
|---------|---------|---------|---------|---------|---------|---------|---------|
| 33933   | 33933   | 33933   | 33933   | 33933   | 33933   | 33933   | 1696650 |
| 33410   | 33613   | 33246   | 33158   | 33317   | 33477   | 32830   | 1674663 |
| 523     | 320     | 686     | 774     | 616     | 455     | 1101    | 21967   |
| 0       | 0       | 1       | 1       | 0       | 1       | 2       | 20      |
| 98.46%  | 99.06%  | 97.98%  | 97.72%  | 98.18%  | 98.66%  | 96.75%  | 98.70%  |
| 1.541%  | 0.943%  | 2.022%  | 2.281%  | 1.815%  | 1.341%  | 3.245%  | 1.295%  |
| 0.0000% | 0.0000% | 0.0029% | 0.0029% | 0.0000% | 0.0029% | 0.0059% | 0.0012% |
